# Supplementary material for: Fall Armyworm Infestation and Development: Screening Tropical Maize Genotypes for Resistance in Zambia
Source: MDPI journal article supplement (doi:10.3390/insects13111020), 2022-11-04
Supplement: s1 [file s1]

Table S1: Artificial diet used for laboratory rearing of FAW

| Ingredient                                                  | Quantity (gram) | Apparatus | Ingredients of the dry mix        |
|-------------------------------------------------------------|-----------------|-----------|-----------------------------------|
| Agar                                                        | 28.50           | Microwave | Soybean flour                     |
| Dry mix                                                     | 216.00          | Blender   | Sucrose (50%)                     |
| Antibiotic                                                  | 1.50            | Spatula   | Wheat germ                        |
| Procedure                                                   |                 |           | Salt mix                          |
| 1: Add agar to 875ml of water                               |                 |           | USDA <sup>†</sup> vitamin pre mix |
| 2: Bring to boil for 1 minute                               |                 |           | Fibre                             |
| 3: Transfer agar solution to blender containing the dry mix |                 |           | Methyl parabene, Sorbic acid      |
| 4: Blend for 30 seconds                                     |                 |           | Ascorbic acid                     |
| 5: Dispense immediately                                     |                 |           |                                   |
| 6: Store diet in the refrigerator                           |                 |           |                                   |

<sup>†</sup> USDA = United States Department of Agriculture

Table S2: Mean performance and AUPPC values of 63 tropical maize genotypes when evaluated under artificial FAW infestation

| Name       | FLD0 <sup>†</sup> | FLD1 <sup>‡</sup> | FLD2 <sup>§</sup> | FLD3 | FLD4 | FLD5 | AUPPC |
|------------|-------------------|-------------------|-------------------|------|------|------|-------|
| TL02562    | 0.00              | 0.86              | 0.87              | 2.17 | 4.81 | 4.86 | 61.63 |
| TL142151   | 0.00              | 1.83              | 1.61              | 2.37 | 4.81 | 4.86 | 67.29 |
| TL12176    | 0.00              | 1.08              | 1.21              | 3.61 | 4.12 | 4.59 | 67.39 |
| TL13159    | 0.00              | 2.33              | 1.25              | 1.83 | 5.83 | 5.83 | 70.98 |
| Teost      | 0.00              | 1.33              | 1.75              | 2.00 | 5.50 | 5.67 | 72.50 |
| CML548-B   | 0.00              | 1.25              | 1.25              | 2.00 | 5.67 | 6.67 | 73.50 |
| TL14266    | 0.00              | 2.08              | 1.83              | 2.00 | 5.67 | 5.67 | 73.98 |
| CZL15231   | 0.00              | 1.83              | 2.33              | 3.17 | 4.33 | 5.17 | 74.50 |
| CZL052     | 0.00              | 1.33              | 1.33              | 2.50 | 5.83 | 5.83 | 75.48 |
| CZL1369    | 0.00              | 1.10              | 1.22              | 2.83 | 5.78 | 5.84 | 76.52 |
| CZL15234   | 0.00              | 1.83              | 2.00              | 2.33 | 5.67 | 5.67 | 76.98 |
| CML539     | 0.00              | 2.17              | 2.50              | 2.83 | 5.00 | 5.17 | 77.48 |
| CZL16137   | 0.00              | 1.58              | 1.92              | 2.00 | 6.00 | 6.00 | 77.52 |
| VL050120   | 0.00              | 1.33              | 1.33              | 3.17 | 5.33 | 6.33 | 77.99 |
| TL151845   | 0.00              | 1.33              | 1.67              | 1.67 | 6.33 | 6.67 | 78.04 |
| TL139113   | 0.00              | 1.67              | 2.33              | 2.33 | 5.67 | 5.67 | 78.96 |
| MM502      | 0.00              | 1.97              | 1.58              | 2.86 | 5.83 | 5.83 | 79.14 |
| ZM7114     | 0.00              | 1.87              | 2.42              | 2.58 | 5.33 | 5.83 | 79.50 |
| CZL16080   | 0.00              | 1.50              | 1.50              | 2.00 | 6.50 | 6.50 | 79.50 |
| EBL1611480 | 0.00              | 1.42              | 1.42              | 2.83 | 6.00 | 6.00 | 79.50 |
| TL142017   | 0.00              | 1.83              | 1.83              | 2.67 | 6.00 | 6.00 | 81.00 |
| TL139180   | 0.00              | 1.83              | 2.17              | 2.67 | 5.67 | 6.00 | 81.04 |
| CZL16084   | 0.00              | 1.75              | 2.33              | 2.36 | 5.88 | 6.37 | 82.54 |
| CZL15209   | 0.00              | 2.25              | 2.67              | 2.67 | 5.67 | 5.67 | 83.04 |
| CZL16093   | 0.00              | 1.58              | 1.83              | 2.83 | 6.17 | 6.17 | 83.46 |

|            |      |      |      |      |      |      |        |
|------------|------|------|------|------|------|------|--------|
| CML491     | 0.00 | 3.02 | 2.87 | 3.11 | 5.31 | 5.36 | 83.78  |
| TL118367   | 0.00 | 1.29 | 1.50 | 3.00 | 6.50 | 6.50 | 85.50  |
| TL101711   | 0.00 | 0.78 | 2.17 | 2.83 | 6.17 | 6.17 | 85.50  |
| EBL169550  | 0.00 | 1.50 | 1.50 | 3.17 | 6.17 | 6.83 | 85.52  |
| Pool 16    | 0.00 | 1.33 | 2.09 | 4.29 | 4.60 | 6.82 | 86.33  |
| CML545-B   | 0.00 | 2.33 | 2.33 | 3.32 | 5.82 | 5.85 | 86.39  |
| CZL16015   | 0.00 | 1.75 | 2.33 | 3.17 | 5.83 | 6.33 | 87.00  |
| TL1316     | 0.00 | 2.33 | 2.33 | 3.50 | 5.83 | 5.83 | 87.48  |
| TL173      | 0.00 | 1.25 | 1.33 | 3.50 | 6.50 | 6.50 | 87.48  |
| CML488     | 0.00 | 2.16 | 2.59 | 3.23 | 5.84 | 5.87 | 87.56  |
| CZL16095   | 0.00 | 1.50 | 2.00 | 2.33 | 6.67 | 7.33 | 87.98  |
| CZL16098   | 0.00 | 0.83 | 0.83 | 3.50 | 6.67 | 7.33 | 87.98  |
| CZL16091   | 0.00 | 1.54 | 1.46 | 2.61 | 7.09 | 7.12 | 88.31  |
| CML546-B   | 0.00 | 2.02 | 1.86 | 3.37 | 5.80 | 7.85 | 89.75  |
| EBL173783  | 0.00 | 1.50 | 1.75 | 3.50 | 6.50 | 6.50 | 90.00  |
| TL116163   | 0.00 | 1.50 | 2.67 | 3.33 | 6.00 | 6.00 | 90.00  |
| CML572     | 0.00 | 2.27 | 2.37 | 2.61 | 6.62 | 6.85 | 90.14  |
| CZL1310c   | 0.00 | 0.99 | 0.95 | 3.57 | 7.07 | 7.10 | 90.86  |
| CKDHL0323  | 0.00 | 2.67 | 2.67 | 4.00 | 5.67 | 5.88 | 91.67  |
| CZL1466    | 0.00 | 1.67 | 1.67 | 2.67 | 7.33 | 7.33 | 92.04  |
| CML538     | 0.00 | 0.99 | 0.95 | 4.17 | 6.83 | 6.83 | 92.22  |
| EBL1738809 | 0.00 | 2.33 | 2.83 | 2.83 | 6.50 | 6.50 | 92.46  |
| CZL1523    | 0.00 | 2.04 | 1.96 | 3.61 | 6.59 | 6.62 | 92.81  |
| ZM4236     | 0.00 | 2.08 | 2.83 | 3.83 | 5.83 | 6.33 | 93.95  |
| CZL16016   | 0.00 | 2.25 | 2.75 | 3.58 | 6.17 | 6.33 | 93.98  |
| TL145748   | 0.00 | 2.33 | 2.08 | 3.50 | 6.83 | 6.83 | 94.98  |
| CZL15142   | 0.00 | 2.67 | 2.75 | 4.17 | 5.83 | 6.17 | 95.02  |
| CZL15033   | 0.00 | 3.05 | 2.81 | 3.84 | 6.33 | 6.43 | 97.15  |
| TL1412139  | 0.00 | 1.53 | 2.58 | 4.58 | 5.83 | 6.50 | 97.46  |
| TL1512847  | 0.00 | 1.33 | 2.75 | 4.50 | 5.83 | 6.50 | 98.00  |
| MM501      | 0.00 | 1.92 | 1.58 | 4.17 | 7.17 | 7.17 | 99.00  |
| CZL03011   | 0.00 | 2.50 | 3.00 | 4.33 | 6.33 | 6.67 | 101.98 |
| CML441-B   | 0.00 | 2.50 | 3.42 | 4.67 | 5.83 | 7.00 | 104.54 |
| CML547-B   | 0.00 | 2.91 | 2.84 | 4.00 | 7.00 | 7.33 | 105.04 |
| CZL16141   | 0.00 | 1.92 | 1.72 | 5.78 | 6.76 | 6.82 | 106.04 |
| CZL15225   | 0.00 | 3.24 | 3.70 | 5.00 | 6.67 | 6.67 | 112.20 |
| CZL15220   | 0.00 | 1.83 | 2.33 | 5.32 | 7.82 | 7.85 | 116.39 |
| CZL1347    | 0.00 | 3.05 | 5.43 | 6.33 | 7.33 | 7.80 | 137.94 |

|            |      |       |       |       |       |       |       |
|------------|------|-------|-------|-------|-------|-------|-------|
| GM         | 0.00 | 1.85  | 2.09  | 3.26  | 6.05  | 6.33  | 87.33 |
| CV (%)     | -    | 49.60 | 92.60 | 45.60 | 16.30 | 14.80 | -     |
| LSD (0.05) | -    | 1.50  | 3.40  | 2.40  | 1.60  | 1.51  | -     |
| SE         | -    | 0.93  | 2.10  | 1.48  | 0.98  | 0.93  | -     |

† FLD0 = stage prior to FLD1 with no visible FAW damage symptoms; ‡ FLD1 = refers to the first FAW leaf damage rate recorded 4 days after the first infestation; § FLD2, FLD3, FLD4, FLD5 = refer to the first, second, third, fourth and fifth FAW

leaf-damage rates recorded at six-day intervals after the second infestation; ¶ AUPPC = Area Under Pest Progress Curve; †† GM = grand mean; ‡ CV = coefficient of variation; §§ LSD = least significant difference; ¶¶ SE = standard error

Table S3: Nature and magnitude of FAW damage revealed by 63 tropical maize genotypes evaluated under artificial FAW infestation

| Genotype   | Damage characteristic |            |           |       |                            |                | Number of plants at final assessment |
|------------|-----------------------|------------|-----------|-------|----------------------------|----------------|--------------------------------------|
|            | None                  | Whorl only | Leaf only | Stalk | Leaf/whorl and fresh frass | Leaf and whorl |                                      |
| CKDHL032   | 0                     | 0          | 1         | 0     | 0                          | 5              | 6                                    |
| CML441-B   | 0                     | 2          | 0         | 0     | 0                          | 2              | 4                                    |
| CML488     | 0                     | 0          | 3         | 0     | 0                          | 0              | 3                                    |
| CML491     | 0                     | 0          | 1         | 0     | 0                          | 1              | 2                                    |
| CML538     | 0                     | 0          | 0         | 0     | 0                          | 2              | 2                                    |
| CML539     | 0                     | 0          | 5         | 1     | 0                          | 0              | 6                                    |
| CML545-B   | 0                     | 0          | 5         | 0     | 0                          | 1              | 6                                    |
| CML546-B   | 0                     | 0          | 1         | 0     | 0                          | 1              | 2                                    |
| CML547-B   | 0                     | 0          | 1         | 0     | 1                          | 0              | 2                                    |
| CML547B    | 0                     | 0          | 2         | 0     | 0                          | 0              | 2                                    |
| CML548-B   | 0                     | 0          | 0         | 0     | 0                          | 2              | 2                                    |
| CML572     | 0                     | 0          | 1         | 0     | 0                          | 0              | 1                                    |
| CZL03011   | 0                     | 0          | 4         | 0     | 0                          | 1              | 5                                    |
| CZL052     | 0                     | 0          | 4         | 0     | 0                          | 0              | 4                                    |
| CZL1310c   | 0                     | 0          | 2         | 0     | 0                          | 3              | 5                                    |
| CZL1347    | 0                     | 0          | 1         | 0     | 0                          | 2              | 3                                    |
| CZL1466    | 0                     | 2          | 0         | 0     | 1                          | 1              | 4                                    |
| CZL15033   | 0                     | 0          | 1         | 0     | 2                          | 0              | 3                                    |
| CZL15142   | 0                     | 0          | 0         | 0     | 0                          | 2              | 2                                    |
| CZL15209   | 0                     | 0          | 3         | 0     | 0                          | 2              | 5                                    |
| CZL15220   | 0                     | 0          | 1         | 0     | 0                          | 2              | 3                                    |
| CZL15225   | 0                     | 0          | 3         | 0     | 1                          | 1              | 5                                    |
| CZL1523    | 0                     | 0          | 0         | 0     | 1                          | 1              | 2                                    |
| CZL15231   | 0                     | 1          | 0         | 0     | 0                          | 2              | 3                                    |
| CZL15234   | 0                     | 0          | 5         | 0     | 0                          | 1              | 6                                    |
| CZL16015   | 0                     | 0          | 2         | 0     | 1                          | 1              | 4                                    |
| CZL16016   | 0                     | 0          | 2         | 0     | 1                          | 2              | 5                                    |
| CZL16080   | 0                     | 0          | 2         | 0     | 1                          | 0              | 3                                    |
| CZL16084   | 0                     | 0          | 0         | 0     | 1                          | 1              | 2                                    |
| CZL16091   | 0                     | 0          | 3         | 0     | 0                          | 0              | 3                                    |
| CZL16093   | 0                     | 0          | 3         | 0     | 0                          | 0              | 3                                    |
| CZL16095   | 0                     | 0          | 1         | 0     | 0                          | 1              | 2                                    |
| CZL16098   | 0                     | 0          | 1         | 0     | 0                          | 2              | 3                                    |
| CZL16137   | 0                     | 0          | 5         | 0     | 0                          | 0              | 5                                    |
| CZL16141   | 0                     | 0          | 0         | 0     | 0                          | 2              | 2                                    |
| EBL1611480 | 0                     | 1          | 4         | 0     | 0                          | 0              | 5                                    |

|                                                    |   |   |     |   |    |    |     |
|----------------------------------------------------|---|---|-----|---|----|----|-----|
| EBL169550                                          | 0 | 0 | 0   | 0 | 1  | 5  | 6   |
| EBL173782                                          | 1 | 0 | 1   | 0 | 1  | 0  | 3   |
| EBL1738809                                         | 0 | 0 | 2   | 0 | 0  | 2  | 4   |
| MM501                                              | 0 | 0 | 3   | 0 | 1  | 1  | 5   |
| MM502                                              | 0 | 0 | 0   | 0 | 0  | 1  | 1   |
| Pool16                                             | 1 | 0 | 1   | 0 | 0  | 1  | 3   |
| Teost                                              | 0 | 0 | 1   | 0 | 1  | 1  | 3   |
| TL101711                                           | 0 | 0 | 1   | 0 | 0  | 0  | 1   |
| TL102562                                           | 0 | 0 | 1   | 0 | 0  | 0  | 1   |
| TL116163                                           | 0 | 1 | 2   | 0 | 0  | 0  | 3   |
| TL118367                                           | 0 | 0 | 1   | 0 | 0  | 1  | 2   |
| TL13159                                            | 0 | 0 | 0   | 0 | 0  | 2  | 2   |
| TL1316                                             | 0 | 0 | 3   | 0 | 0  | 2  | 5   |
| TL139113                                           | 0 | 0 | 1   | 0 | 0  | 1  | 2   |
| TL139180                                           | 0 | 0 | 1   | 0 | 0  | 3  | 4   |
| TL142017                                           | 0 | 0 | 1   | 0 | 0  | 2  | 3   |
| TL142139                                           | 0 | 0 | 2   | 0 | 0  | 4  | 6   |
| TL142151                                           | 0 | 0 | 1   | 0 | 0  | 0  | 1   |
| TL14266                                            | 0 | 0 | 3   | 0 | 0  | 2  | 5   |
| TL145748                                           | 0 | 0 | 4   | 0 | 0  | 2  | 6   |
| TL151284                                           | 0 | 0 | 0   | 0 | 0  | 1  | 1   |
| TL151845                                           | 1 | 0 | 1   | 0 | 0  | 1  | 3   |
| TL173                                              | 0 | 0 | 2   | 0 | 0  | 4  | 6   |
| VL05120                                            | 0 | 0 | 1   | 0 | 0  | 0  | 1   |
| ZM4236                                             | 0 | 0 | 0   | 0 | 0  | 3  | 3   |
| ZM7114                                             | 0 | 0 | 1   | 0 | 0  | 0  | 1   |
| Total number<br>of plants<br>showing the<br>damage | 3 | 7 | 101 | 1 | 14 | 80 | 206 |
