# Supplementary material for: Fall Armyworm Infestation and Development: Screening Tropical Maize Genotypes for Resistance in Zambia
Source: MDPI journal article supplement (doi:10.3390/insects13111020), 2022-11-04
Supplement: s1 [file s1]

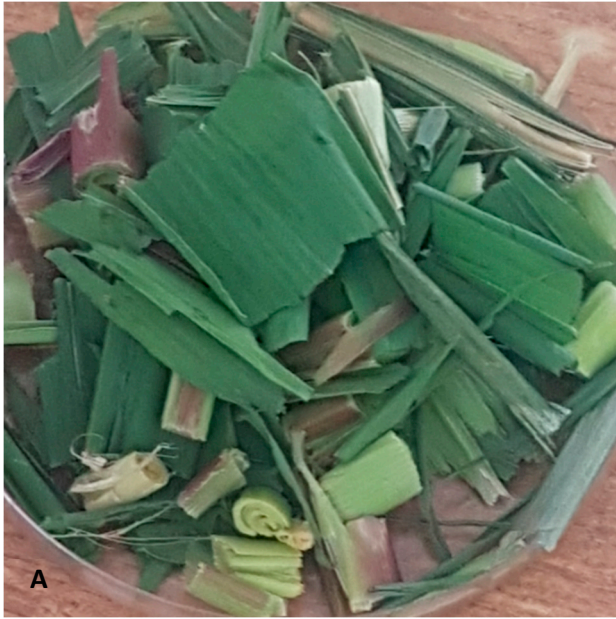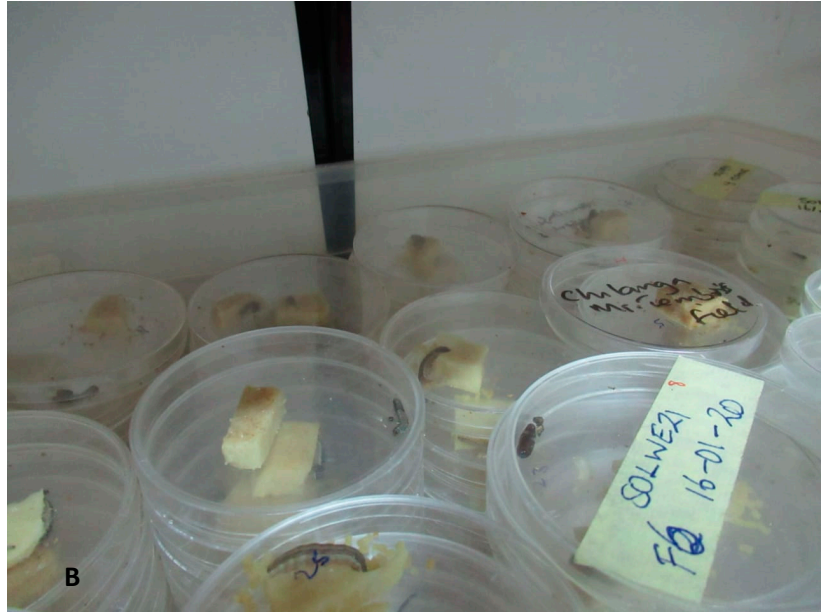

Figure S1: Diets used for rearing of FAW on Petri dishes. A- Natural diet of maize leaves and stalks. B- Artificial diet containing wheat, soy and other ingredients

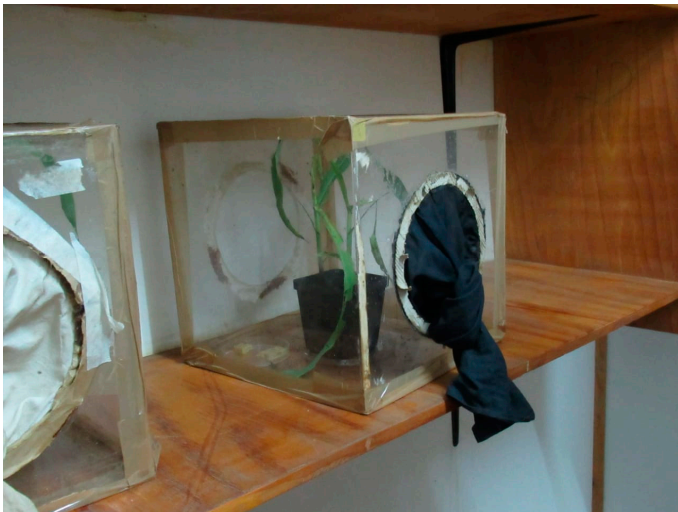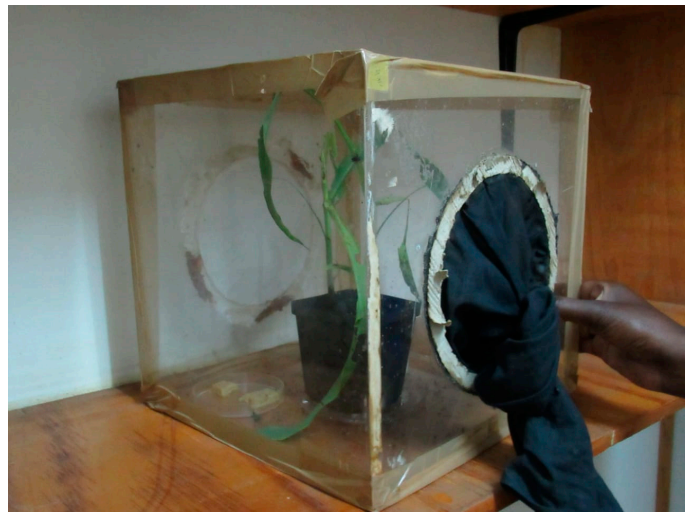

Figure S2: Rearing cage for adult FAW moths
